# Supplementary material
Source: bioRxiv or medRxiv preprint supplement (https://www.biorxiv.org/highwire/filestream/130994/field_highwire_adjunct_files/3/431361-4.pdf)

## Final-course Assessment survey: IBT\_2017

Purpose: Results from this survey will be used to improve the quality of workshops delivered and for reporting p

Therefore, please take time to fill this form in as fully as you can. Your feedback is highly recognized and appreciated

**\*\*Please note that personal data will be anonymised and will not affect your status in any way. They would mainly be used to assure the integrity of the collected data\*\***

**\*Required**

1. **Email address \***

---

2. *Mark only one oval.*

Option 1

3. **Full name: \***

---

## Course evaluation

4. **For module 6: Phylogenetics, to what extent was: \***

1 is very uncomfortable, 5 is very comfortable

*Mark only one oval per row.*

|                                                | 1                     | 2                     | 3                     | 4                     | 5                     |
|------------------------------------------------|-----------------------|-----------------------|-----------------------|-----------------------|-----------------------|
| The module met your expectation                | <input type="radio"/> | <input type="radio"/> | <input type="radio"/> | <input type="radio"/> | <input type="radio"/> |
| Content of the modules given appropriate       | <input type="radio"/> | <input type="radio"/> | <input type="radio"/> | <input type="radio"/> | <input type="radio"/> |
| Assignments and assessments were relevant      | <input type="radio"/> | <input type="radio"/> | <input type="radio"/> | <input type="radio"/> | <input type="radio"/> |
| The instructor was speaking fast, or unclearly | <input type="radio"/> | <input type="radio"/> | <input type="radio"/> | <input type="radio"/> | <input type="radio"/> |
| The instructor was responsive in the forum     | <input type="radio"/> | <input type="radio"/> | <input type="radio"/> | <input type="radio"/> | <input type="radio"/> |
| The local Teaching Assistants were supportive  | <input type="radio"/> | <input type="radio"/> | <input type="radio"/> | <input type="radio"/> | <input type="radio"/> |

**5. For module 5: Genomics, to what extent was \***

1 is very uncomfortable, 5 is very comfortable

Mark only one oval per row.

|                                                | 1                     | 2                     | 3                     | 4                     | 5                     |
|------------------------------------------------|-----------------------|-----------------------|-----------------------|-----------------------|-----------------------|
| The module met your expectation                | <input type="radio"/> | <input type="radio"/> | <input type="radio"/> | <input type="radio"/> | <input type="radio"/> |
| Content of the modules given appropriate       | <input type="radio"/> | <input type="radio"/> | <input type="radio"/> | <input type="radio"/> | <input type="radio"/> |
| Assignments and assessments were relevant      | <input type="radio"/> | <input type="radio"/> | <input type="radio"/> | <input type="radio"/> | <input type="radio"/> |
| The instructor was speaking fast, or unclearly | <input type="radio"/> | <input type="radio"/> | <input type="radio"/> | <input type="radio"/> | <input type="radio"/> |
| The instructor was responsive in the forum     | <input type="radio"/> | <input type="radio"/> | <input type="radio"/> | <input type="radio"/> | <input type="radio"/> |
| The local Teaching Assistants were supportive  | <input type="radio"/> | <input type="radio"/> | <input type="radio"/> | <input type="radio"/> | <input type="radio"/> |

**6. For module 4: Multiple Sequence alignment, to what extent was: \***

1 is very uncomfortable, 5 is very comfortable

Mark only one oval per row.

|                                                | 1                     | 2                     | 3                     | 4                     | 5                     |
|------------------------------------------------|-----------------------|-----------------------|-----------------------|-----------------------|-----------------------|
| The module met your expectation                | <input type="radio"/> | <input type="radio"/> | <input type="radio"/> | <input type="radio"/> | <input type="radio"/> |
| Content of the modules given appropriate       | <input type="radio"/> | <input type="radio"/> | <input type="radio"/> | <input type="radio"/> | <input type="radio"/> |
| Assignments and assessments were relevant      | <input type="radio"/> | <input type="radio"/> | <input type="radio"/> | <input type="radio"/> | <input type="radio"/> |
| The instructor was speaking fast, or unclearly | <input type="radio"/> | <input type="radio"/> | <input type="radio"/> | <input type="radio"/> | <input type="radio"/> |
| The instructor was responsive in the forum     | <input type="radio"/> | <input type="radio"/> | <input type="radio"/> | <input type="radio"/> | <input type="radio"/> |
| The local Teaching Assistants were supportive  | <input type="radio"/> | <input type="radio"/> | <input type="radio"/> | <input type="radio"/> | <input type="radio"/> |

**General feedback**

**7. What are your recommendations to improve any of the logistics or any aspect of the course? \***

---



---



---



---



---

**8. Briefly describe your experience in the IBT course. \***

---

9. I hereby, would like to give permission and consent for my responses to be used as quotes about CBSB courses

Mark only one oval.

- Yes
- No

10. Will you be confident to recommend the IBT course to others? \*

Mark only one oval.

- Yes
- No
- Maybe

11. In your opinion, what of the following would further enhance your bioinformatics learning \*

Tick all that apply.

- Providing more advanced courses exploring some of the topics in more details
- Having an opportunity for a face-to-face training with instructors
- Having focused courses run in a shorter duration
- Working in projects with bioinformatics components
- Other: \_\_\_\_\_

12. Do you think the topics of the modules were very basic or advanced? \*

\_\_\_\_\_

13. To what extent was the IBT 2017 comparable to other Bioinformatics workshops you have attended previously? \*

Hint: 1 means not comparable at all, 5 means very similar

Mark only one oval per row.

|                                              | 1                     | 2                     | 3                     | 4                     | 5                     |
|----------------------------------------------|-----------------------|-----------------------|-----------------------|-----------------------|-----------------------|
| Language wise                                | <input type="radio"/> | <input type="radio"/> | <input type="radio"/> | <input type="radio"/> | <input type="radio"/> |
| course nature of interaction (face-to-face)  | <input type="radio"/> | <input type="radio"/> | <input type="radio"/> | <input type="radio"/> | <input type="radio"/> |
| access to international community            | <input type="radio"/> | <input type="radio"/> | <input type="radio"/> | <input type="radio"/> | <input type="radio"/> |
| international recognition of the certificate | <input type="radio"/> | <input type="radio"/> | <input type="radio"/> | <input type="radio"/> | <input type="radio"/> |
| content and scope                            | <input type="radio"/> | <input type="radio"/> | <input type="radio"/> | <input type="radio"/> | <input type="radio"/> |
| pace of the course                           | <input type="radio"/> | <input type="radio"/> | <input type="radio"/> | <input type="radio"/> | <input type="radio"/> |
| forming of new relations                     | <input type="radio"/> | <input type="radio"/> | <input type="radio"/> | <input type="radio"/> | <input type="radio"/> |
| Duration                                     | <input type="radio"/> | <input type="radio"/> | <input type="radio"/> | <input type="radio"/> | <input type="radio"/> |

**14. Rate how comfortable you are with the following aspects of the course \***

Copy from the exit survey!  
 Mark only one oval per row.

|                                               | 1                     | 2                     | 3                     | 4                     | 5                     |
|-----------------------------------------------|-----------------------|-----------------------|-----------------------|-----------------------|-----------------------|
| Language of instruction                       | <input type="radio"/> | <input type="radio"/> | <input type="radio"/> | <input type="radio"/> | <input type="radio"/> |
| Overall content of the taught modules         | <input type="radio"/> | <input type="radio"/> | <input type="radio"/> | <input type="radio"/> | <input type="radio"/> |
| Submission of assignments to Vula             | <input type="radio"/> | <input type="radio"/> | <input type="radio"/> | <input type="radio"/> | <input type="radio"/> |
| Asking/ Answering question in Vula forum/chat | <input type="radio"/> | <input type="radio"/> | <input type="radio"/> | <input type="radio"/> | <input type="radio"/> |
| Networking with others from your classroom    | <input type="radio"/> | <input type="radio"/> | <input type="radio"/> | <input type="radio"/> | <input type="radio"/> |
| Networking with others from other locations   | <input type="radio"/> | <input type="radio"/> | <input type="radio"/> | <input type="radio"/> | <input type="radio"/> |

**15. In the future which do you intend to attend more, Online courses or Face-to-face courses? Why? \***

\_\_\_\_\_

\_\_\_\_\_

\_\_\_\_\_

\_\_\_\_\_

\_\_\_\_\_

**16. How would you rate your local classroom environment? \***

1 is very uncomfortable, 5 is very comfortable  
 Mark only one oval per row.

|                                                          | 1                     | 2                     | 3                     | 4                     | 5                     |
|----------------------------------------------------------|-----------------------|-----------------------|-----------------------|-----------------------|-----------------------|
| Audio quality                                            | <input type="radio"/> | <input type="radio"/> | <input type="radio"/> | <input type="radio"/> | <input type="radio"/> |
| Internet access                                          | <input type="radio"/> | <input type="radio"/> | <input type="radio"/> | <input type="radio"/> | <input type="radio"/> |
| Air conditioning                                         | <input type="radio"/> | <input type="radio"/> | <input type="radio"/> | <input type="radio"/> | <input type="radio"/> |
| Accessibility to services (bathrooms & cafeteria)        | <input type="radio"/> | <input type="radio"/> | <input type="radio"/> | <input type="radio"/> | <input type="radio"/> |
| Support from the local staff (Faculty and Library Staff) | <input type="radio"/> | <input type="radio"/> | <input type="radio"/> | <input type="radio"/> | <input type="radio"/> |

**Research Areas of interest**

**17. What are the Bioinformatics research areas of interest that you wish to pursue?**

We know we asked this before, but maybe you changed your mind with the new content introduced

*Mark only one oval.*

- Database resources
  - Sequence Alignment
  - Comparative Genomics
  - Genome variation
  - Genome annotation
  - Phylogenetics
  - Proteomics and Structural Bioinformatics
  - Other: \_\_\_\_\_
- 

Powered by

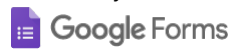

Supplement: Supplementary file [file 431361-4.pdf]
